# Supplementary material
Source: PubMed Central journal article supplement (PMC3837754)
Supplement: AEM.02184-13_zam999104912so1.pdf [file AEM.02184-13_zam999104912so1.pdf]

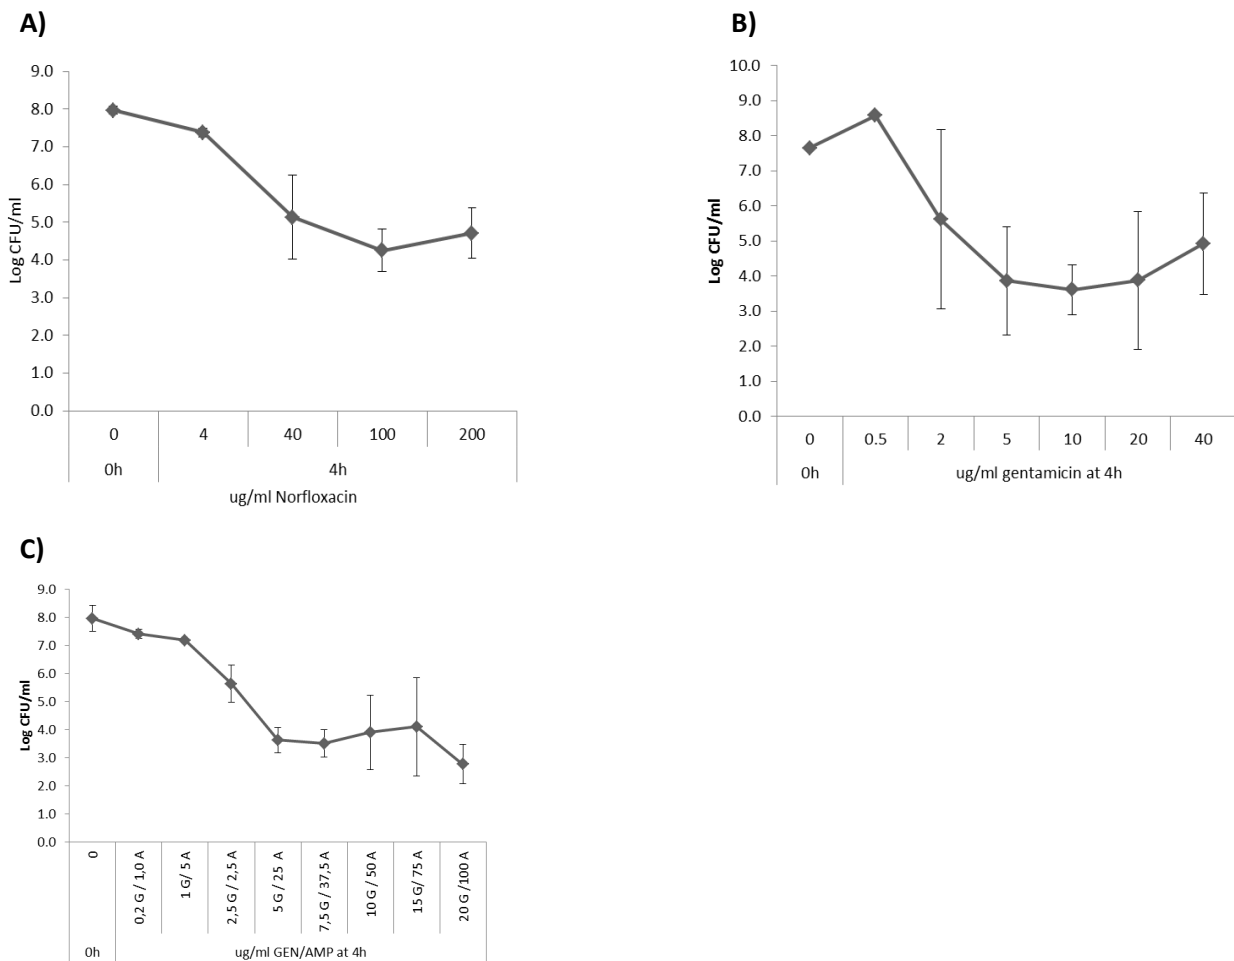

**Fig. S1** Concentration-dependent killing kinetics of *L. monocytogenes* EGD when treated with bactericidal antibiotic. A) Treatment of *L. monocytogenes* EGD (◆) with increasing concentrations of norfloxacin for 4h. The experiment was performed with three biological replicates with SD shown. B) Treatment of *L. monocytogenes* EGD (◆) with increasing concentrations of gentamicin for 4h. The experiment was performed with two biological replicates with SD shown. C) Treatment of *L. monocytogenes* EGD (■) with increasing concentrations of mix of gentamicin and ampicillin. The ratio of gentamicin (G) and ampicillin (A) was 1:5. The experiment was performed with three biological replicates with SD shown.

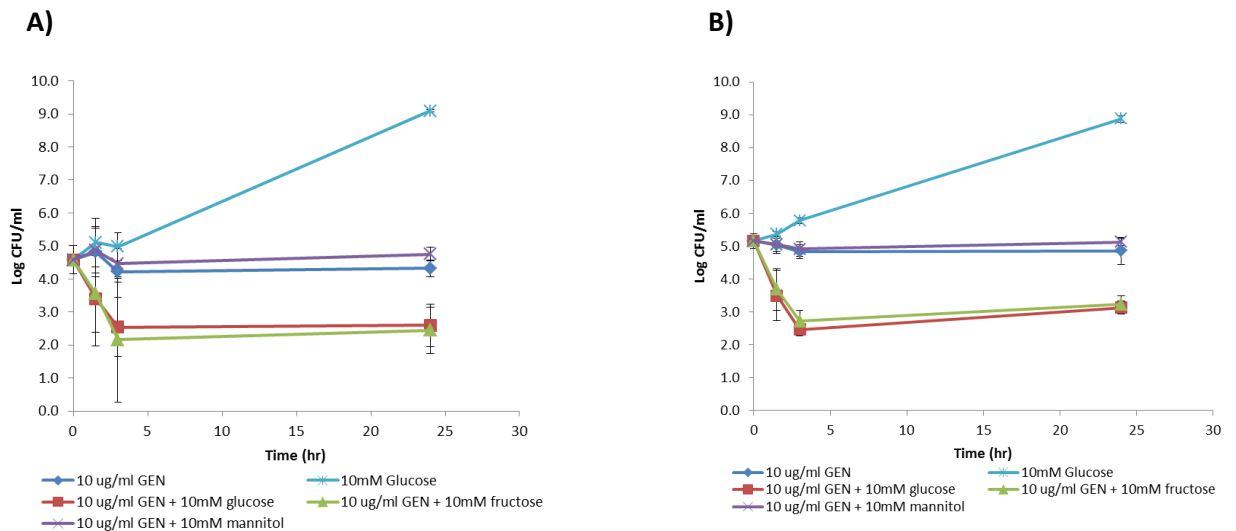

**Fig. S2** Time-dependent killing of *L. monocytogenes* EGD norfloxacin-persisters by addition of fermentable carbohydrates to gentamicin. Norfloxacin-persisters were isolated upon 4h treatment with A) 100 µg ml<sup>-1</sup> or B) 200 µg ml<sup>-1</sup> norfloxacin, washed and treated with indicated carbohydrates. The experiment was performed with three biological replicates with SD shown.
